# Supplementary material
Source: PubMed Central journal article supplement (PMC6508520)

a.

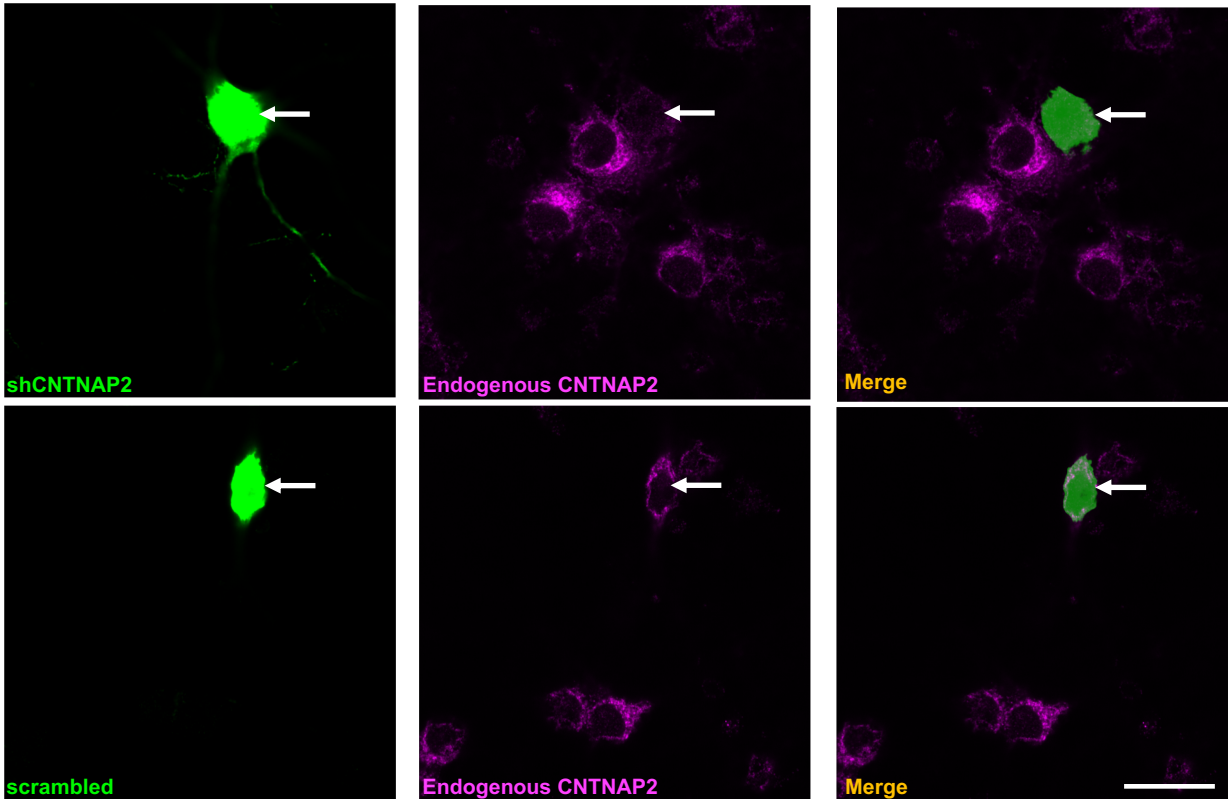

b.

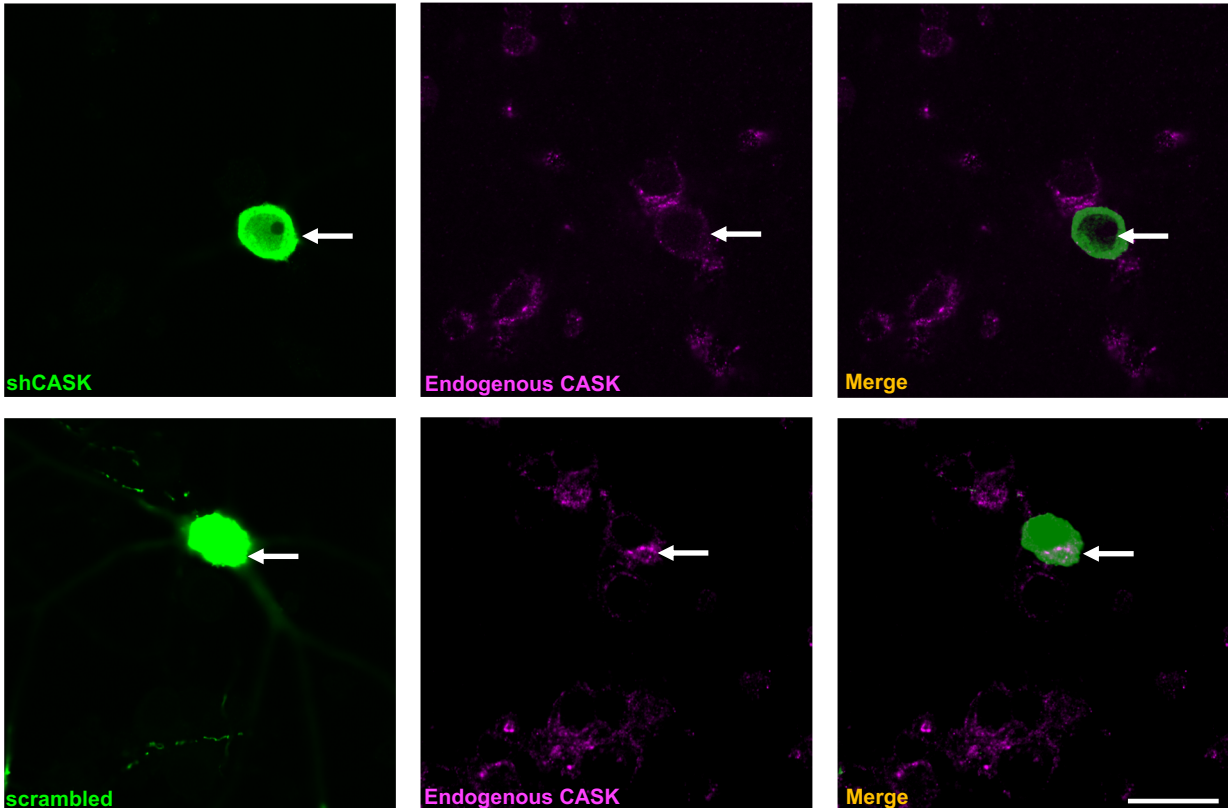

Supplemental Figure 1. Validation of shCNTNAP2 and shCASK constructs.

Supplement: NIHMS1023568-supplement-Suppl_4.pdf [file NIHMS1023568-supplement-Suppl_4.pdf]
